# Supplementary material
Source: publisher figshare collection journal article supplement (https://sage.figshare.com/ndownloader/files/14478728)
Supplement: Supplementary file 1 [file 14478728]

## Supplemental Material

### Appendix 1. The eNACT Group Facilitation Competency Checklist.

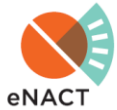

Neurorehabilitation and Clinical Translation

## eNACT Group Facilitation Competency Checklist

This checklist is designed to rate the competencies of clinicians delivering group-based interventions in rehabilitation and therapy settings.

Raters should actively look for each competency and tick the appropriate box, as described below.

\*Note: **BOLD** items are **essential** (i.e., must be demonstrated every time); Non-bold items do not need to be demonstrated every time

- '**Observed - Done well**' – facilitator's demonstration of the skill shows expertise, and would likely involve several of the examples given or instances of the criterion, or one instance/some examples done comprehensively and with sophistication.
- '**Observed - Done adequately**' should be used when the examinee has demonstrated the skill in a competent manner (i.e., meets the threshold for competent delivery), though it may be less consistently demonstrated and/or show less sophistication or fluency.
- '**Observed - Not done well**' captures instances where the skill was attempted but very few features were present, or was delivered superficially, inconsistently or was undermined by errors.
- '**Not observed – despite opportunity**' should be used when a skill that should have been demonstrated was not observed at all during the session (this applies for essential items)
- '**Not observed – no opportunity**' applies when the skill was not needed during the session (for non-essential items), or when there was no opportunity to demonstrate the skill (for essential items).

### SCORING

| Rating                             | Score – simple method (for treatment fidelity ratings) | Score – detailed method (for monitoring skill development) |
|------------------------------------|--------------------------------------------------------|------------------------------------------------------------|
| Observed - Done well               | 2                                                      | 3                                                          |
| Observed - Done adequately         | 2                                                      | 2                                                          |
| Observed - Not done well           | 1                                                      | 1                                                          |
| Not observed – despite opportunity | 0                                                      | 0                                                          |
| Not observed – no opportunity      | N/A                                                    | N/A                                                        |

The overall score should be calculated by adding up the scores and then dividing by the number of applicable items (16 minus the number of N/A items).

For example, if a group facilitator scored 2 on all items and all 16 items were applicable, this would result in an overall score of  $32/16 = 2$ . If only the 13 essential items (in bold) were applicable, this would result in an overall score of  $26/13 = 2$ .

Therefore, an overall score of 2 reflects adequate competence in group facilitation. Overall scores can range from a minimum of 0 to a maximum of 2 (simple method) or 3 (detailed method).

| Criterion                                                                                                                                                                                                   | Not observed – no opportunity | Not observed - despite opportunity | Observed – Not done well | Observed – Done adequately | Observed – Done well | Basis for Rating (e.g, verbatim quote from facilitator) |
|-------------------------------------------------------------------------------------------------------------------------------------------------------------------------------------------------------------|-------------------------------|------------------------------------|--------------------------|----------------------------|----------------------|---------------------------------------------------------|
| <b>A. Facilitating focused group discussion:</b>                                                                                                                                                            |                               |                                    |                          |                            |                      |                                                         |
| <b>A1. Displays knowledge and understanding of material/content covered during session</b> (e.g., provides coherent explanations, addresses questions and comments appropriately)                           |                               |                                    |                          |                            |                      |                                                         |
| <b>A2. Provides reflective summaries of participant contributions which highlight the most relevant point(s)</b>                                                                                            |                               |                                    |                          |                            |                      |                                                         |
| <b>A3. Skilfully manages verbose, tangential, or inappropriate contributions</b> (e.g., by re-directing discussion, interrupting, or picking up on most relevant aspect of the contribution)                |                               |                                    |                          |                            |                      |                                                         |
| <b>A4. Encourages contributions from all group participants</b> (e.g., by directly asking/addressing less talkative participants, making eye contact, asking "does anyone else experience the same thing?") |                               |                                    |                          |                            |                      |                                                         |
| <b>A5. Contributes appropriately to group discussion even when not leading the topic/module</b> (applies only when there is more than 1 facilitator)                                                        |                               |                                    |                          |                            |                      |                                                         |
| <b>B. Communication skills:</b>                                                                                                                                                                             |                               |                                    |                          |                            |                      |                                                         |
| <b>B1. Concepts are explained clearly and are focused on the key points, with minimal use of jargon</b>                                                                                                     |                               |                                    |                          |                            |                      |                                                         |
| <b>B2. Provides examples from daily life to explain information/strategies, which are relevant to the topic of discussion</b>                                                                               |                               |                                    |                          |                            |                      |                                                         |
| <b>B3. Maintains appropriate pacing of information</b> (e.g. does not speak too fast, or finish too quickly; checks for understanding)                                                                      |                               |                                    |                          |                            |                      |                                                         |
| <b>B4. Uses conversational tone (i.e., is not too much like a teacher), and does not fixate too rigidly on notes</b> (note that this item refers to the style of                                            |                               |                                    |                          |                            |                      |                                                         |

| <b>Criterion</b>                                                                                                                                                                                                                         | <b>Not<br/>observed –<br/>no<br/>opportunity</b> | <b>Not<br/>observed -<br/>despite<br/>opportunity</b> | <b>Observed<br/>– Not<br/>done well</b> | <b>Observed<br/>– Done<br/>adequately</b> | <b>Observed<br/>– Done<br/>well</b> | <b>Basis for Rating<br/>(e.g, verbatim quote<br/>from facilitator)</b> |
|------------------------------------------------------------------------------------------------------------------------------------------------------------------------------------------------------------------------------------------|--------------------------------------------------|-------------------------------------------------------|-----------------------------------------|-------------------------------------------|-------------------------------------|------------------------------------------------------------------------|
| delivery, while B1 refers to the content)                                                                                                                                                                                                |                                                  |                                                       |                                         |                                           |                                     |                                                                        |
| <b>C. Interpersonal style:</b>                                                                                                                                                                                                           |                                                  |                                                       |                                         |                                           |                                     |                                                                        |
| <b>C1. Demonstrates empathy towards group participants</b> (e.g., attends to and validates both positive and negative expressed emotions, overtly seeks to understand participants' perspectives, shows concern for participants' needs) |                                                  |                                                       |                                         |                                           |                                     |                                                                        |
| <b>C2. Shows positive regard to group participants</b> (e.g., uses affirming, encouraging, and supportive statements and facial expressions)                                                                                             |                                                  |                                                       |                                         |                                           |                                     |                                                                        |
| C3. Responds sensitively to any expressions of distress and follows up on issues of mental health or physical risk where necessary                                                                                                       |                                                  |                                                       |                                         |                                           |                                     |                                                                        |
| <b>D. Session structure:</b>                                                                                                                                                                                                             |                                                  |                                                       |                                         |                                           |                                     |                                                                        |
| <b>D1. Covers content within each module thoroughly but efficiently</b>                                                                                                                                                                  |                                                  |                                                       |                                         |                                           |                                     |                                                                        |
| <b>D2. Sign-posts topic changes clearly</b> (e.g., uses verbal or visual cues to make it obvious that the topic is changing)                                                                                                             |                                                  |                                                       |                                         |                                           |                                     |                                                                        |
| <b>D3. Gives breaks when scheduled and if participants are showing signs of fatigue</b>                                                                                                                                                  |                                                  |                                                       |                                         |                                           |                                     |                                                                        |
| D4. Responds flexibly when important, urgent or unpredictable issues arise (e.g., by briefly diverting from the topic)                                                                                                                   |                                                  |                                                       |                                         |                                           |                                     |                                                                        |
